# Supplementary material for: Artificial Nesting Hills Promote Wild Bees in Agricultural Landscapes
Source: MDPI journal article supplement (doi:10.3390/insects13080726), 2022-08-14
Supplement: s1 [file s1]

This document provides electronic supplementary material for the article titled:

## **Artificial nesting hills promote wild bees in agricultural landscapes**

Ulrich Neumüller, Hannah Burger, Antonia Veronika Mayr, Sebastian Hopfenmüller, Nadine Herwig, Ronald Burger, Olaf Diestelhorst, Katrin Emmerich, Mare Haider, Manuel Kiefer, Jonas Konicek, Johann-Christoph Kornmilch, Sabrina Krausch, Marina Moser, Christoph Saure, Arno Schanowski, Erwin Scheuchl, Julia Sing, Max Wagner, Julia Witter, Hans Richard Schwenninger, Manfred Ayasse

### **Content**

**Table S1** - Research areas of the bee survey

**Table S2** - Identified bee species and number of individuals monitored on the nesting hills.

**Table S3** - Coefficients of the post-hoc comparison of species richness and abundance between the first and the second year

**Figure S1** - Individual-based randomized species accumulation curves comparing wild bee richness on nesting hills to the three reference habitat types separated for the first and second year of the study

**Table S4** - Coefficients for models testing the number of species and number of individuals against the explanatory variables

**See Appendix A for a construction and management guideline for establishing artificial nesting hills for wild bees**

**Table S1.** Research areas of the bee survey. Areas where the extended monitoring (4 instead of 2 monitoring events per year and pollen survey) took place are marked with an asterisk.

| Research area             | Coordinates   |
|---------------------------|---------------|
| Reichenbach*              | N48.62 E9.73  |
| Eselsburger Tal*          | N48.60 E10.18 |
| Hirschtal*                | N48.69 E10.03 |
| Obergailingen             | N47.69 E8.77  |
| Kappel-Grafenhausen       | N48.29 E7.73  |
| Hügelsheim                | N48.79 E8.091 |
| Elsbachtal                | N51.08 E6.52  |
| Rekultivierung Garzweiler | N51.02 E6.54  |
| Annweiler                 | N49.21 E7.97  |
| Rohrbach                  | N49.13 E8.11  |
| Golßen                    | N51.98 E13.53 |
| Temmen                    | N53.10 E13.77 |
| Frankenbacher Schotter*   | N49.14 E9.16  |
| Dettenheim*               | N49.17 E8.38  |
| Griesheimer Düne*         | N49.84 E8.56  |
| Rotböhl*                  | N49.92 E8.62  |
| Landshut                  | N48.44 E12.11 |
| Dingolfing-Landau         | N48.68 E12.55 |
| Guest                     | N54.04 E13.44 |
| Wangelkow                 | N53.91 E13.81 |

**Table S2.** Identified bee species and number of individuals monitored on the nesting hills. The Red list status is categorized according to Westrich et al. (2011). Statistical analyses were performed on ground-nesting bees.

| Species                                      | Individuals | Red list       | Nesting |
|----------------------------------------------|-------------|----------------|---------|
| <i>Andrena agilissima</i> (Scopoli, 1770)    | 1           | 3              | en      |
| <i>Andrena alfkenella</i> Perkins, 1914      | 1           | LC             | en      |
| <i>Andrena barbilabris</i> (Kirby, 1802)     | 12          | LC             | en      |
| <i>Andrena bicolor</i> Fabricius, 1775       | 1           | *              | en      |
| <i>Andrena carantonica</i> Pérez, 1902       | 3           | *              | en      |
| <i>Andrena cineraria</i> (Linnaeus, 1758)    | 7           | *              | en      |
| <i>Andrena curvungula</i> Thomson, 1870      | 1           | 3              | en      |
| <i>Andrena dorsata</i> (Kirby, 1802)         | 5           | *              | en      |
| <i>Andrena flavipes</i> Panzer, 1799         | 130         | *              | en      |
| <i>Andrena florivaga</i> Eversmann, 1852     | 1           | *              | en      |
| <i>Andrena haemorrhoa</i> (Fabricius, 1781)  | 3           | *              | en      |
| <i>Andrena hattorfiana</i> (Fabricius, 1775) | 1           | 3              | en      |
| <i>Andrena labiata</i> Fabricius, 1781       | 1           | *              | en      |
| <i>Andrena minutula</i> (Kirby, 1802)        | 42          | *              | en      |
| <i>Andrena minutuloides</i> Perkins, 1914    | 7           | *              | en      |
| <i>Andrena nigriceps</i> (Kirby, 1802)       | 2           | 2              | en      |
| <i>Andrena nigroaenea</i> (Kirby, 1802)      | 1           | *              | en      |
| <i>Andrena nigrospina</i> Thomson, 1872      | 3           | 3 <sup>1</sup> | en      |
| <i>Andrena nitida</i> (Müller, 1776)         | 2           | *              | en      |
| <i>Andrena niveata</i> Friese, 1887          | 2           | 3              | en      |
| <i>Andrena ovatula</i> (Kirby, 1802)         | 6           | *              | en      |
| <i>Andrena pilipes</i> Fabricius, 1781       | 1           | 3              | en      |
| <i>Andrena propinqua</i> Schenck, 1853       | 1           | *2             | en      |
| <i>Andrena rhenana</i> Stöckert, 1930        | 1           | NT             | en      |
| <i>Andrena subopaca</i> Nylander, 1848       | 4           | *              | en      |
| <i>Andrena vaga</i> Panzer, 1799             | 1           | *              | en      |
| <i>Andrena viridescens</i> Viereck, 1916     | 6           | LC             | en      |
| <i>Trachusa byssina</i> (Panzer, 1798)       | 1           | 3              | en      |
| <i>Anthidium manicatum</i> (Linnaeus, 1758)  | 1           | *              | hy      |
| <i>Anthidium oblongatum</i> (Illiger, 1806)  | 3           | LC             | hy      |
| <i>Anthidium punctatum</i> Latreille, 1809   | 2           | LC             | en      |
| <i>Anthidiellum strigatum</i> (Panzer, 1805) | 1           | LC             | hy      |
| <i>Anthophora bimaculata</i> (Panzer, 1798)  | 7           | 3              | en      |

|                                                 |     |    |         |
|-------------------------------------------------|-----|----|---------|
| <i>Anthophora furcata</i> (Panzer, 1798)        | 1   | LC | hy      |
| <i>Anthophora plumipes</i> (Pallas, 1772)       | 3   | *  | en      |
| <i>Anthophora retusa</i> (Linnaeus, 1758)       | 1   | LC | en      |
| <i>Bombus humilis</i> Illiger, 1806             | 3   | 3  | hy      |
| <i>Bombus lapidarius</i> (Linnaeus, 1758)       | 13  | *  | en      |
| <i>Bombus pascuorum</i> (Scopoli, 1763)         | 2   | *  | en      |
| <i>Bombus sylvarum</i> (Linnaeus, 1761)         | 2   | LC | en      |
| <i>Bombus terrestris</i> (Linnaeus, 1758)       | 50  | *  | en      |
| <i>Ceratina chalybea</i> Chevrier, 1872         | 1   | 3  | hy      |
| <i>Ceratina cucurbitina</i> (Rossi, 1792)       | 2   | *  | hy      |
| <i>Ceratina cyanea</i> (Kirby, 1802)            | 2   | *  | hy      |
| <i>Chelostoma florissomne</i> (Linnaeus, 1758)  | 74  | *  | hy      |
| <i>Coelioxys afra</i> Lepeletier, 1841          | 19  | 3  | en (pa) |
| <i>Coelioxys conica</i> (Linnaeus, 1758)        | 2   | LC | en (pa) |
| <i>Coelioxys conoidea</i> (Illiger, 1806)       | 2   | 3  | en (pa) |
| <i>Colletes cunicularius</i> (Linnaeus, 1761)   | 139 | *  | en      |
| <i>Colletes fodiens</i> (Geoffroy, 1785)        | 9   | 3  | en      |
| <i>Colletes similis</i> Schenck, 1853           | 1   | LC | en      |
| <i>Dasypoda hirtipes</i> (Fabricius, 1793)      | 1   | LC | en      |
| <i>Epeoloides coecutiens</i> (Fabricius, 1775)  | 1   | *  | en (pa) |
| <i>Epeolus variegatus</i> (Linnaeus, 1758)      | 7   | LC | en (pa) |
| <i>Eucera nigrescens</i> Pérez, 1879            | 2   | *  | en      |
| <i>Halictus leucaheneus</i> Ebmer, 1972         | 6   | 3  | en      |
| <i>Halictus maculatus</i> Smith, 1848           | 10  | *  | en      |
| <i>Halictus quadricinctus</i> (Fabricius, 1776) | 124 | 3  | en      |
| <i>Halictus scabiosae</i> (Rossi, 1790)         | 187 | *  | en      |
| <i>Halictus sexcinctus</i> (Fabricius, 1775)    | 99  | 3  | en      |
| <i>Halictus simplex</i> Blüthgen, 1923          | 32  | *  | en      |
| <i>Halictus subauratus</i> (Rossi, 1792)        | 77  | *  | en      |
| <i>Halictus tumulorum</i> (Linnaeus, 1758)      | 14  | *  | en      |
| <i>Heriades truncorum</i> (Linnaeus, 1758)      | 2   | *  | hy      |
| <i>Hoplitis adunca</i> (Panzer, 1798)           | 28  | *  | hy      |
| <i>Hoplitis leucomelana</i> (Kirby, 1802)       | 2   | *  | hy      |
| <i>Hoplitis papaveris</i> (Latreille, 1799)     | 3   | 1  | en      |
| <i>Hylaeus angustatus</i> (Schenck, 1861)       | 1   | *  | hy      |
| <i>Hylaeus brevicornis</i> Nylander, 1852       | 1   | *  | hy      |
| <i>Hylaeus communis</i> Nylander, 1852          | 5   | *  | hy      |

|                                              |     |    |         |
|----------------------------------------------|-----|----|---------|
| Hylaeus kahri Förster, 1871                  | 1   | *  | hy      |
| Hylaeus lineolatus (Schenck, 1861)           | 2   | NE | hy      |
| Hylaeus variegatus (Fabricius, 1798)         | 4   | LC | en      |
| Lasioglossum aeratum (Kirby, 1802)           | 3   | 3  | en      |
| Lasioglossum albipes (Fabricius, 1781)       | 2   | *  | en      |
| Lasioglossum brevicorne (Schenck, 1868)      | 2   | 3  | en      |
| Lasioglossum calceatum (Scopoli, 1763)       | 9   | *  | en      |
| Lasioglossum clypeare (Schenck, 1853)        | 1   | 2  | en      |
| Lasioglossum costulatum (Kriechbaumer, 1873) | 1   | 3  | en      |
| Lasioglossum fulvicorne (Kirby, 1802)        | 5   | *  | en      |
| Lasioglossum glabriusculum (Morawitz, 1872)  | 46  | *  | en      |
| Lasioglossum intermedium (Schenck, 1868)     | 1   | 3  | en      |
| Lasioglossum interruptum (Panzer, 1798)      | 17  | 3  | en      |
| Lasioglossum laticeps (Schenck, 1868)        | 34  | *  | en      |
| Lasioglossum lativentre (Schenck, 1853)      | 4   | LC | en      |
| Lasioglossum leucozonium (Schränk, 1781)     | 8   | *  | en      |
| Lasioglossum lucidulum (Schenck, 1861)       | 21  | *  | en      |
| Lasioglossum malachurum (Kirby, 1802)        | 46  | *  | en      |
| Lasioglossum minutissimum (Kirby, 1802)      | 3   | *  | en      |
| Lasioglossum morio (Fabricius, 1793)         | 48  | *  | en      |
| Lasioglossum nitidiusculum (Kirby, 1802)     | 1   | LC | en      |
| Lasioglossum nitidulum (Fabricius, 1804)     | 1   | *  | en      |
| Lasioglossum pauxillum (Schenck, 1853)       | 131 | *  | en      |
| Lasioglossum politum (Schenck, 1853)         | 147 | *  | en      |
| Lasioglossum punctatissimum (Schenck, 1853)  | 2   | *  | en      |
| Lasioglossum pygmaeum (Schenck, 1853)        | 1   | NE | en      |
| Lasioglossum quadrinotatum (Schenck, 1861)   | 3   | 3  | en      |
| Lasioglossum semilucens (Alfken, 1914)       | 1   | *  | en      |
| Lasioglossum sexnotatum (Kirby, 1802)        | 1   | 3  | en      |
| Lasioglossum subhirtum (Lepelletier, 1841)   | 1   | 3  | en      |
| Lasioglossum villosulum (Kirby, 1802)        | 131 | *  | en      |
| Lasioglossum zonulum (Smith, 1848)           | 3   | *  | en      |
| Megachile circumcincta (Kirby, 1802)         | 2   | LC | hy      |
| Megachile ericetorum Lepelletier, 1841       | 2   | *  | en/hy   |
| Megachile pilidens Alfken, 1924              | 18  | 3  | en      |
| Melitta leporina (Panzer, 1799)              | 1   | *  | en      |
| Nomada alboguttata Herrich-Schäffer, 1839    | 1   | *  | en (pa) |

|                                          |    |    |             |
|------------------------------------------|----|----|-------------|
| Nomada argentata Herrich-Schäffer, 1839  | 3  | 2  | en (pa)     |
| Nomada atroscutellaris Strand, 1921      | 4  | LC | en (pa)     |
| Nomada bifasciata Olivier, 1811          | 1  | *  | en (pa)     |
| Nomada distinguenda Morawitz, 1873       | 2  | NE | en (pa)     |
| Nomada fabriciana (Linnaeus, 1767)       | 2  | *  | en (pa)     |
| Nomada flavoguttata (Kirby, 1802)        | 12 | *  | en (pa)     |
| Nomada flavopicta (Kirby, 1802)          | 1  | *  | en (pa)     |
| Nomada fucata Panzer, 1798               | 13 | *  | en (pa)     |
| Nomada fulvicornis Fabricius, 1793       | 1  | *  | en (pa)     |
| Nomada lathburiana (Kirby, 1802)         | 2  | *  | en (pa)     |
| Nomada panzeri Lepeletier, 1841          | 2  | *  | en (pa)     |
| Nomada sheppardana (Kirby 1802)          | 2  | *  | en (pa)     |
| Nomada succincta Panzer, 1798            | 1  | *  | en (pa)     |
| Nomioides minutissimus (Rossi, 1790)     | 3  | 2  | en          |
| Osmia bicolor (Schränk, 1781)            | 1  | *  | hy (helico) |
| Osmia aurulenta (Panzer, 1799)           | 1  | *  | hy (helico) |
| Osmia bicornis (Linnaeus, 1758)          | 19 | *  | hy          |
| Osmia brevicornis (Fabricius, 1798)      | 2  | NE | hy          |
| Osmia caerulescens (Linnaeus, 1758)      | 2  | *  | hy          |
| Osmia spinulosa (Kirby, 1802)            | 1  | 3  | hy (helico) |
| Panurgus calcaratus (Scopoli, 1763)      | 4  | *  | en          |
| Sphecodes albilabris (Fabricius, 1793)   | 27 | *  | en (pa)     |
| Sphecodes crassus Thomson, 1870          | 16 | *  | en (pa)     |
| Sphecodes cristatus von Hagens, 1882     | 5  | NE | en (pa)     |
| Sphecodes ephippius (Linnaeus, 1767)     | 45 | *  | en (pa)     |
| Sphecodes ferruginatus von Hagens, 1882  | 3  | *  | en (pa)     |
| Sphecodes gibbus (Linnaeus, 1758)        | 29 | *  | en (pa)     |
| Sphecodes hyalinatus von Hagens, 1882    | 2  | *  | en (pa)     |
| Sphecodes longulus von Hagens, 1882      | 6  | *  | en (pa)     |
| Sphecodes miniatus von Hagens, 1882      | 9  | *  | en (pa)     |
| Sphecodes monilicornis (Kirby, 1802)     | 35 | *  | en (pa)     |
| Sphecodes pellucidus Smith, 1845         | 7  | LC | en (pa)     |
| Sphecodes pseudofasciatus Blüthgen, 1925 | 1  | DD | en (pa)     |
| Sphecodes puncticeps Thomson, 1870       | 35 | *  | en (pa)     |
| Sphecodes reticulatus Thomson, 1870      | 2  | *  | en (pa)     |
| Sphecodes rufiventris (Panzer, 1798)     | 1  | *  | en (pa)     |

---

**Red list categories:**

1 = critically endangered (CR)

2 = endangered (EN)

3 = vulnerable (VU)

NT = near threatened

LC = least concern

DD = data deficient

NE = not evaluated

\* = not threatened

<sup>1</sup>Red list status unknown, given status of *Andrena pilipes*<sup>2</sup>Red list status unknown, given status of *Andrena dorsata***Nesting behaviour:**

en = endogeic (nesting in the ground)

en/hy = endogeic/hypergeic (nesting in the ground or close to the ground)

hy = hypergeic (nesting in a variety of structures above ground)

helico = helicophile (nesting in snail shells)

pa = parasitic

**Table S3.** Coefficients of the post-hoc comparison of species richness and abundance between the first and the second year. Significant values ( $p < 0.05$ ) are printed in bold.

| <i>Species richness</i> |                 |           |           |          |                  |
|-------------------------|-----------------|-----------|-----------|----------|------------------|
| <i>contrast</i>         | <i>estimate</i> | <i>SE</i> | <i>df</i> | <i>t</i> | <i>p-value</i>   |
| 2019 - 2020             | -0.209          | 0.0638    | 278       | -3.269   | <b>0.001</b>     |
| <i>Abundance</i>        |                 |           |           |          |                  |
| <i>contrast</i>         | <i>estimate</i> | <i>SE</i> | <i>df</i> | <i>t</i> | <i>p-value</i>   |
| 2019 - 2020             | -0.435          | 0.0836    | 275       | -5.204   | <b>&lt;0.001</b> |

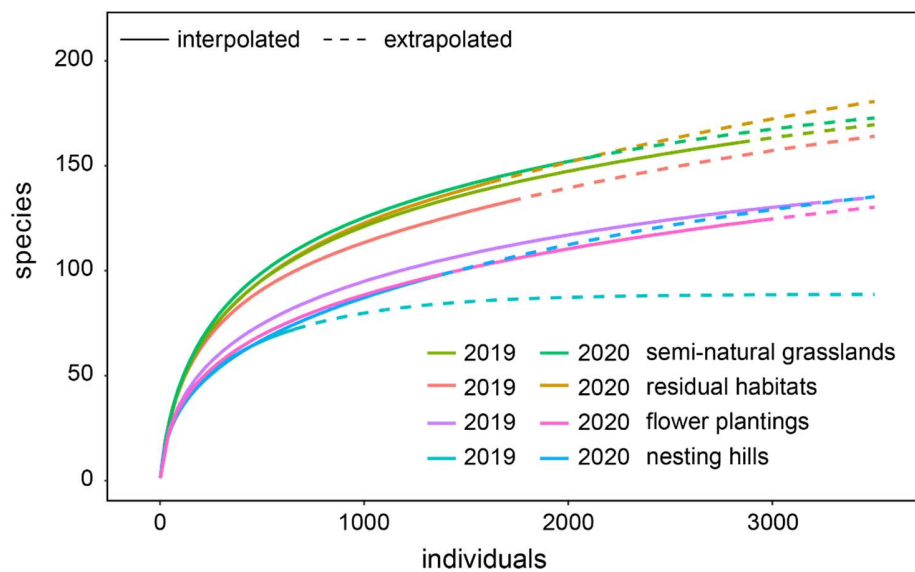

**Figure S1.** Individual-based randomized species accumulation curves comparing wild bee richness on nesting hills to the three reference habitat types flower plantings, semi-natural grasslands, and residual habitats separated for the first and second year of the study.



**Table S4.** Coefficients for models testing the number of species and number of individuals against the explanatory variables. Significant values ( $p < 0.05$ ) are printed in bold.

| Number of species                                    |                     |                   |                |                |
|------------------------------------------------------|---------------------|-------------------|----------------|----------------|
| <i>smooth terms</i>                                  | <i>Estimated Df</i> | <i>Chi.sq</i>     | <i>p-value</i> |                |
| Aspect (degrees from North)                          | 2.667               | 39.780            | <0.001         |                |
| Soil temperature 5cm                                 | 2.517               | 16.430            | 0.001          |                |
| Day of year                                          | 2.569               | 19.010            | <0.001         |                |
| Hill ID (random variable)                            | 13.611              | 60.530            | <0.001         |                |
| Year (random variable)                               | 0.924               | 18.990            | <0.001         |                |
|                                                      |                     |                   |                |                |
| Number of individuals                                |                     |                   |                |                |
| <i>Parametric coefficients</i>                       | <i>Estimate</i>     | <i>Std. Error</i> | <i>z</i>       | <i>p-value</i> |
| Year (2019 vs. 2020)                                 | 0.823               | 0.213             | 3.863          | <0.001         |
| Semi-natural landscape elements                      | -0.001              | 0.019             | -0.075         | 0.940          |
| Year:Semi-natural landscape elements (2019 vs. 2020) | -0.022              | 0.008             | -2.762         | 0.006          |
|                                                      |                     |                   |                |                |
| <i>smooth terms</i>                                  | <i>Estimated Df</i> | <i>Chi.sq</i>     | <i>p-value</i> |                |
| Aspect (degrees from North)                          | 3.009               | 39.660            | <0.001         |                |
| Soil temperature 5cm                                 | 1.002               | 6.835             | 0.009          |                |
| Day of year                                          | 3.116               | 29.271            | <0.001         |                |
| Hill ID (random variable)                            | 15.090              | 154.709           | <0.001         |                |
| Year (random variable)                               | 0.000               | 0.000             | 0.008          |                |

## Reference

Westrich, P.; Frommer, U.; Mandery, K.; Riemann, H.; Ruhnke, H.; Saure, C.; Voith, J. Rote Liste und Gesamtartenliste der Bienen (Hymenoptera, Apidae) Deutschlands. In *Rote Liste gefährdeter Tiere, Pflanzen und Pilze Deutschlands. Band 3: Wirbellose Tiere (Teil 1)*, Naturschutz, B.f., Ed.; Naturschutz und Biologische Vielfalt: Bonn-Bad Godesberg, 2011; Volume 70, pp. 373-416.
